# Supplementary material
Source: publisher figshare collection journal article supplement (https://acs.figshare.com/ndownloader/files/5196703)
Supplement: Supplementary file 1 [file 5196703]

data_global
#===============================================================================
_audit_creation_date               15-05-03

# 1. SUBMISSION DETAILS

_publ_contact_author_name           # Name of author for correspondance
;
Jean-Pierre Djukic
;
_publ_contact_author_address        # Address of author for correspondance
;
UMR 7513, 4 rue Blaise Pascal F67070 Strasbourg France
;
_publ_contact_author_phone         '+33(0)390241523'
_publ_contact_author_fax           '+33(0)390241526'
_publ_contact_author_email         djukic@chimie.u-strasbg.fr

_publ_requested_journal            'Organometallics'
_publ_contact_letter
;
     Please consider this CIF submission for publication as a new structure
     paper in Organometallics. The figures, chemical
     structure diagram (scheme), Transfert of Copyright Agreement form and
     structure factors will be sent on receipt of your acknowledgement letter
;

_publ_requested_category            FM
#===============================================================================

# 2. PROCESSING SUMMARY (IUCr Office Use Only)

_journal_date_recd_electronic     ?

_journal_date_to_coeditor         ?
_journal_date_from_coeditor       ?
_journal_date_accepted            ?

_journal_date_printers_first      ?
_journal_date_printers_final      ?
_journal_date_proofs_out          ?
_journal_date_proofs_in           ?


_journal_coeditor_name            ?
_journal_coeditor_code            ?
_journal_coeditor_notes
; ?
;

_journal_techeditor_code          ?
_journal_techeditor_notes
; ?
;

_journal_coden_ASTM               ?
_journal_name_full                ?
_journal_year                     ?
_journal_volume                   ?

_journal_issue                    ?
_journal_page_first               ?
_journal_page_last                ?

_journal_suppl_publ_number        ?
_journal_suppl_publ_pages         ?

#===============================================================================

# 3. TITLE AND AUTHOR LIST

_publ_section_title
;
Cis-bischelated Pd(II) complexes from ortho-mercurated
tricarbonyl(eta-6-arene)chromium complexes
;

# The loop structure below should contain the names  and addresses of all
# authors, in the required order  of publication. Repeat as necessary.

loop_
_publ_author_name
_publ_author_address
'Berger Alexsandro'          #<--'Last name, first name'
;
Laboratoire de Synthese Metallo-Induites
UMR7513CNRS
STRASBOURG
France
;
'Djukic Jean-Pierre'          #<--'Last name, first name'
;
Laboratoire de Synthese Metallo-Induites
UMR7513CNRS
STRASBOURG
France
;
'Pfeffer Michel'          #<--'Last name, first name'
;
Laboratoire de Synthese Metallo-Induites
UMR7513CNRS
STRASBOURG
France
;
'Lacour Jerome'          #<--'Last name, first name'
;
Departement de Chimie Organique
Universite de Geneve
GENEVE
SUISSE
;
'Vial Laurent'          #<--'Last name, first name'
;
Departement de Chimie Organique
Universite de Geneve
GENEVE
SUISSE
;
'deCian Andre'          #<--'Last name, first name'
;
Service Commun dAnalyse par diffraction des rayons X
UMR7513CNRS
STRASBOURG
France
;
'Kyritsakas-Gruber Nathalie'          #<--'Last name, first name'
;
Service Commun d'Analyse par diffraction des rayons X
UMR7513CNRS
STRASBOURG
France
;


# 4. TEXT

_publ_section_abstract
; ?
;

_publ_section_comment
; ?
;

_publ_section_exptl_prep
; ?
;


_publ_section_exptl_refinement
; ?
;


_publ_section_references
;


Burla, M.C., Camalli, M., Cascarano, G.,Giacovazzo, C., Polidori, G.,
Spagna, R. &Viterbo, D. (1989).  SIR.  J. Appl. Cryst. 22, 389-393.

OpenMoleN, Interactive Intelligent Structure  solution (1997)
Nonius B.V., Delft, The Netherlands.

KappaCCD Operation Manual (1997), Nonius B.V., Delft, The Nederlands.

Otwinowski, Z. & Minor, W. (1997), Methods in Enzymology, 276, 307-326.

Walker, N. & Stuart, D. (1983). Acta Cryst.,  A39, 158-166.

;

_publ_section_figure_captions
; ?
;

_publ_section_acknowledgements
; ?
;


#===============================================================================
 # If more than one structure is reported, sections 5-10 should be filled in
 # per structure. For each data set, replace the ? in the data_? line below
 # by a unique identifier.


data_8a                                 

#===============================================================================

# 5. CHEMICAL DATA

_chemical_name_systematic
; ?
;
_chemical_name_common              ?
_chemical_formula_moiety           'C23 H20 Cr N2 O3 Pd'
_chemical_formula_structural       ?
_chemical_formula_analytical       ?
_chemical_formula_sum              'C23 H20 Cr N2 O3 Pd'
_chemical_formula_weight           530.82
_chemical_melting_point            ?
_chemical_compound_source          ?

 loop_
     _atom_type_symbol
     _atom_type_description
     _atom_type_scat_dispersion_real
     _atom_type_scat_dispersion_imag
     _atom_type_scat_source
 C  ?  0.002  0.002 International_Tables_Vol_IV_Table_2.3.1
 H  ?  0.000  0.000 International_Tables_Vol_IV_Table_2.3.1
 Cr ?  0.284  0.624 International_Tables_Vol_IV_Table_2.3.1
 N  ?  0.004  0.003 International_Tables_Vol_IV_Table_2.3.1
 O  ?  0.008  0.006 International_Tables_Vol_IV_Table_2.3.1
 Pd ? -1.177  1.007 International_Tables_Vol_IV_Table_2.3.1


#===============================================================================

 # 6. CRYSTAL DATA

_symmetry_cell_setting              monoclinic
_symmetry_space_group_name_H-M      'P 1 21/n 1'
_symmetry_space_group_name_Hall     '-P 2yn'
loop_
     _symmetry_equiv_pos_as_xyz
     'x,y,z'
     1/2-x,1/2+y,1/2-z
     -x,-y,-z
     1/2+x,1/2-y,1/2+z
_cell_length_a                     11.0250(3)
_cell_length_b                     16.3553(4)
_cell_length_c                     11.6928(3)
_cell_angle_alpha                  90
_cell_angle_beta                   103.800(5)
_cell_angle_gamma                  90
_cell_volume                       2047.55(9)
_cell_formula_units_Z              4
_cell_measurement_temperature      173
_cell_measurement_reflns_used      9793
_cell_measurement_theta_min         1.4
_cell_measurement_theta_max        30.0
_cell_special_details
;
Cell parameters refined using Scalepack part of DENZO
 Z. Otwinowski, W. Minor, 1997
;

_exptl_crystal_description         prism
_exptl_crystal_colour              'yellow'
_exptl_crystal_size_max            0.08
_exptl_crystal_size_mid            0.08
_exptl_crystal_size_min            0.04
_exptl_crystal_density_meas        ?
_exptl_crystal_density_diffrn      1.72
_exptl_crystal_density_method      'none'

_exptl_crystal_F_000               1064
_exptl_absorpt_coefficient_mu      1.437
_exptl_absorpt_correction_type     refdelf_(Walker_&_Stuart,_1983)         
_exptl_absorpt_correction_T_min    0.8935
_exptl_absorpt_correction_T_max    1.0000

#===============================================================================

# 7. EXPERIMENTAL DATA

_diffrn_special_details
; ?
;

_diffrn_ambient_temperature        173
_diffrn_radiation_wavelength       0.71073
_diffrn_radiation_type             Mo-K\a

_diffrn_source                     xray_tube

_diffrn_radiation_monochromator    graphite
_diffrn_measurement_device_type    KappaCCD
_diffrn_measurement_method         '\p scans' 

_diffrn_measurement_details
;
   9793 reflections were collected using program Collect
 ("Collect" Data collection software, Nonius B.V., 1998)
 The conditions were as follow : crystal to detector distance =  36. mm.
 Scan angle =  2.0 deg 1 scans of   50 sec per frame.
 Data collection was divided into  2 set(s)
 with the following starting angles and number of frames :

 Set 1 Theta =    8.80 Omega =    0.00 Kappa =    0.00   90 frames
 Set 2 Theta =   -8.50 Kappa =  -78.00 Phi   =    0.00   26 frames
 Friedel pairs were averaged. Internal R = 0.04
;

_diffrn_standards_number           ?
_diffrn_standards_interval_count   ?
_diffrn_standards_interval_time    ?
_diffrn_standards_decay_%          0

_diffrn_reflns_number              9793
_diffrn_reflns_av_R_equivalents    0.040
_diffrn_reflns_av_sigmaI/netI      0.333
_diffrn_reflns_limit_h_min         -15
_diffrn_reflns_limit_h_max         15
_diffrn_reflns_limit_k_min         -19
_diffrn_reflns_limit_k_max         23
_diffrn_reflns_limit_l_min         -16
_diffrn_reflns_limit_l_max         16
_diffrn_reflns_theta_min           2.5
_diffrn_reflns_theta_max           30.00

_reflns_number_total               6164
_reflns_number_gt                  3421
_reflns_threshold_expression       >3.0\s(I)

_computing_structure_solution      Direct_methods_(SIR,_Burla_et_al.,_1989)
_computing_structure_refinement    LSFM_OpenMoleN_(_1997)
_computing_molecular_graphics      ?
_computing_publication_material    CIFGEN_IN_OpenMoleN_(_1997)

#===============================================================================

# 8. REFINEMENT DATA


_refine_ls_structure_factor_coef   F
_refine_ls_matrix_type             full
_refine_ls_weighting_scheme        sigma
_refine_ls_hydrogen_treatment      noref
_refine_ls_extinction_method       none
_refine_ls_extinction_expression   ?
_refine_ls_extinction_coef         ?
_refine_ls_abs_structure_Flack     ?
_refine_ls_number_reflns           3421
_refine_ls_number_parameters       271
_refine_ls_number_restraints       0
_refine_ls_number_constraints      0
_refine_ls_R_factor_all            0.075
_refine_ls_R_factor_gt             0.032
_refine_ls_wR_factor_all           0.280
_refine_ls_wR_factor_ref           0.032
_refine_ls_goodness_of_fit_all      9.251
_refine_ls_goodness_of_fit_ref     0.968
_refine_ls_shift/su_max            0.004
_refine_ls_shift/esd_mean          0.001
_refine_diff_density_max           0.620
_refine_diff_density_min           -0.235

#===============================================================================

# 9. ATOMIC COORDINATES AND THERMAL PARAMETERS

loop_
_atom_site_label
_atom_site_fract_x
_atom_site_fract_y
_atom_site_fract_z
_atom_site_U_iso_or_equiv
_atom_site_adp_type
_atom_site_calc_flag
_atom_site_calc_attached_atom
_atom_site_type_symbol
PD  0.12854(3)  0.11869(1)  0.14131(2)  0.0189(1)  Uani  ? ?  Pd
CR  -0.16925(5)  0.22708(3)  0.21137(5)  0.0208(3)  Uani  ? ?  Cr
C1  -0.3316(4)  0.2316(2)  0.1264(3)  0.030(2)  Uani  ? ?  C
O1  -0.4355(3)  0.2328(2)  0.0747(2)  0.041(2)  Uani  ? ?  O
C2  -0.2281(3)  0.2272(2)  0.3460(3)  0.026(2)  Uani  ? ?  C
O2  -0.2630(3)  0.2261(1)  0.4304(2)  0.043(1)  Uani  ? ?  O
C3  -0.1850(4)  0.1159(2)  0.2129(3)  0.028(2)  Uani  ? ?  C
O3  -0.1992(3)  0.0455(1)  0.2180(2)  0.038(1)  Uani  ? ?  O
C4  0.1865(3)  0.0726(2)  0.3039(3)  0.020(2)  Uani  ? ?  C
C5  0.1202(3)  0.0644(2)  0.3908(3)  0.023(2)  Uani  ? ?  C
C6  0.1645(3)  0.0165(2)  0.4905(3)  0.028(2)  Uani  ? ?  C
C7  0.2763(4)  -0.0250(2)  0.5050(3)  0.028(2)  Uani  ? ?  C
C8  0.3444(4)  -0.0193(2)  0.4200(3)  0.027(2)  Uani  ? ?  C
C9  0.3006(3)  0.0300(2)  0.3212(3)  0.023(2)  Uani  ? ?  C
C10  0.3703(3)  0.0399(2)  0.2275(3)  0.027(2)  Uani  ? ?  C
N1  0.2809(3)  0.0423(1)  0.1100(2)  0.022(1)  Uani  ? ?  N
C11  0.2407(4)  -0.0428(2)  0.0753(3)  0.032(2)  Uani  ? ?  C
C12  0.3432(3)  0.0768(2)  0.0242(3)  0.033(2)  Uani  ? ?  C
C13  0.0262(3)  0.2100(2)  0.1799(3)  0.019(2)  Uani  ? ?  C
C14  0.0333(3)  0.2476(2)  0.2900(3)  0.022(2)  Uani  ? ?  C
C15  -0.0335(3)  0.3194(2)  0.3002(3)  0.024(2)  Uani  ? ?  C
C16  -0.1097(3)  0.3565(2)  0.2024(3)  0.023(2)  Uani  ? ?  C
C17  -0.1206(3)  0.3200(2)  0.0914(3)  0.023(2)  Uani  ? ?  C
C18  -0.0516(3)  0.2493(2)  0.0788(3)  0.019(1)  Uani  ? ?  C
C19  -0.0516(3)  0.2141(2)  -0.0370(3)  0.021(2)  Uani  ? ?  C
C20  -0.1274(3)  0.2410(2)  -0.1444(3)  0.025(2)  Uani  ? ?  C
C21  -0.1200(4)  0.2036(2)  -0.2475(3)  0.027(2)  Uani  ? ?  C
C22  -0.0378(4)  0.1392(2)  -0.2434(3)  0.028(2)  Uani  ? ?  C
C23  0.0347(3)  0.1162(2)  -0.1365(3)  0.027(2)  Uani  ? ?  C
N2  0.0322(3)  0.1529(1)  -0.0341(2)  0.020(1)  Uani  ? ?  N
H1  0.0428  0.0921  0.3818  0.0309  Uiso  calc  C5  H
H2  0.1178  0.0124  0.5488  0.0374  Uiso  calc  C6  H
H3  0.3063  -0.0576  0.5732  0.0414  Uiso  calc  C7  H
H4  0.4204  -0.0486  0.4289  0.0376  Uiso  calc  C8  H
H5  0.4259  -0.0049  0.2303  0.0356  Uiso  calc  C10  H
H6  0.4167  0.0894  0.2400  0.0356  Uiso  calc  C10  H
H7  0.1835  -0.0423  0.0003  0.0408  Uiso  calc  C11  H
H8  0.3116  -0.0748  0.0715  0.0408  Uiso  calc  C11  H
H9  0.2014  -0.0656  0.1319  0.0408  Uiso  calc  C11  H
H10  0.2864  0.0785  -0.0509  0.0418  Uiso  calc  C12  H
H11  0.3708  0.1306  0.0475  0.0418  Uiso  calc  C12  H
H12  0.4129  0.0438  0.0202  0.0418  Uiso  calc  C12  H
H13  0.0846  0.2239  0.3589  0.0294  Uiso  calc  C14  H
H14  -0.0263  0.3430  0.3757  0.0313  Uiso  calc  C15  H
H15  -0.1536  0.4054  0.2102  0.0308  Uiso  calc  C16  H
H16  -0.1752  0.3433  0.0240  0.0300  Uiso  calc  C17  H
H17  -0.1839  0.2850  -0.1456  0.0327  Uiso  calc  C20  H
H18  -0.1705  0.2218  -0.3206  0.0373  Uiso  calc  C21  H
H19  -0.0320  0.1115  -0.3133  0.0381  Uiso  calc  C22  H
H20  0.0902  0.0715  -0.1344  0.0345  Uiso  calc  C23  H


loop_
_atom_site_aniso_label
_atom_site_aniso_U_11
_atom_site_aniso_U_22
_atom_site_aniso_U_33
_atom_site_aniso_U_12
_atom_site_aniso_U_13
_atom_site_aniso_U_23
_atom_site_aniso_type_symbol
PD  0.0202(1)  0.01878(9)  0.0177(1)  0.0021(1)  0.0046(1)  -0.0000(1)  Pd
CR  0.0230(3)  0.0202(2)  0.0194(3)  0.0005(2)  0.0062(2)  -0.0015(2)  Cr
C1  0.033(2)  0.035(2)  0.023(2)  -0.002(2)  0.011(2)  -0.001(1)  C
O1  0.026(2)  0.075(2)  0.036(1)  -0.006(1)  0.004(1)  -0.002(1)  O
C2  0.036(2)  0.018(1)  0.026(2)  0.004(2)  0.012(2)  -0.004(1)  C
O2  0.059(2)  0.038(1)  0.035(1)  0.003(1)  0.026(1)  -0.001(1)  O
C3  0.032(2)  0.032(1)  0.021(2)  0.002(2)  0.010(2)  -0.006(1)  C
O3  0.064(2)  0.025(1)  0.034(1)  -0.007(1)  0.019(1)  -0.003(1)  O
C4  0.022(2)  0.019(1)  0.018(2)  -0.001(1)  0.003(1)  -0.003(1)  C
C5  0.022(2)  0.023(1)  0.024(2)  -0.003(1)  0.000(2)  -0.002(1)  C
C6  0.033(2)  0.033(2)  0.020(2)  -0.013(2)  0.005(2)  -0.000(1)  C
C7  0.045(2)  0.021(1)  0.024(2)  -0.004(2)  -0.003(2)  0.003(1)  C
C8  0.029(2)  0.023(1)  0.029(2)  0.003(2)  -0.005(2)  -0.001(1)  C
C9  0.026(2)  0.019(1)  0.023(2)  -0.002(1)  0.004(2)  0.000(1)  C
C10  0.022(2)  0.026(1)  0.033(2)  0.003(2)  0.004(2)  -0.001(1)  C
N1  0.024(2)  0.019(1)  0.024(1)  -0.001(1)  0.008(1)  -0.001(1)  N
C11  0.037(2)  0.026(1)  0.032(2)  -0.002(2)  0.012(2)  -0.002(1)  C
C12  0.032(2)  0.029(2)  0.039(2)  0.000(2)  0.014(2)  0.002(2)  C
C13  0.017(2)  0.023(1)  0.017(2)  -0.003(1)  0.003(1)  -0.002(1)  C
C14  0.023(2)  0.026(1)  0.019(2)  0.001(1)  0.004(2)  -0.002(1)  C
C15  0.025(2)  0.026(1)  0.022(2)  -0.004(2)  0.008(2)  -0.010(1)  C
C16  0.026(2)  0.016(1)  0.030(2)  -0.000(1)  0.010(2)  -0.004(1)  C
C17  0.025(2)  0.020(1)  0.026(2)  0.002(1)  0.008(2)  0.003(1)  C
C18  0.019(2)  0.018(1)  0.019(2)  -0.002(1)  0.006(1)  -0.002(1)  C
C19  0.023(2)  0.018(1)  0.021(2)  -0.003(1)  0.007(1)  0.003(1)  C
C20  0.027(2)  0.024(1)  0.025(2)  0.003(2)  0.008(2)  0.006(1)  C
C21  0.036(2)  0.032(2)  0.017(2)  -0.005(2)  0.005(2)  0.005(1)  C
C22  0.042(2)  0.028(1)  0.018(2)  -0.005(2)  0.010(2)  -0.003(1)  C
C23  0.029(2)  0.026(1)  0.026(2)  -0.000(2)  0.010(2)  -0.001(1)  C
N2  0.025(2)  0.019(1)  0.019(1)  -0.000(1)  0.008(1)  -0.003(1)  N

# 10. MOLECULAR GEOMETRY


loop_
_geom_bond_atom_site_label_1
_geom_bond_atom_site_label_2
_geom_bond_distance
_geom_bond_site_symmetry_1
_geom_bond_site_symmetry_2
_geom_bond_publ_flag
PD  C4  2.003(3)  . .  ?
PD  N1  2.193(3)  . .  ?
PD  C13  1.987(3)  . .  ?
PD  N2  2.146(3)  . .  ?
CR  C1  1.830(4)  . .  ?
CR  C2  1.840(4)  . .  ?
CR  C3  1.827(3)  . .  ?
C1  O1  1.161(5)  . .  ?
C2  O2  1.142(4)  . .  ?
C3  O3  1.165(4)  . .  ?
C4  C5  1.392(5)  . .  ?
C4  C9  1.410(5)  . .  ?
C5  C6  1.393(5)  . .  ?
C6  C7  1.381(5)  . .  ?
C7  C8  1.384(5)  . .  ?
C8  C9  1.397(5)  . .  ?
C9  C10  1.489(5)  . .  ?
C10  N1  1.489(4)  . .  ?
N1  C11  1.488(4)  . .  ?
N1  C12  1.457(5)  . .  ?
C13  C14  1.412(4)  . .  ?
C13  C18  1.437(4)  . .  ?
C14  C15  1.406(5)  . .  ?
C15  C16  1.386(5)  . .  ?
C16  C17  1.407(5)  . .  ?
C17  C18  1.411(5)  . .  ?
C18  C19  1.472(4)  . .  ?
C19  C20  1.403(4)  . .  ?
C19  N2  1.357(4)  . .  ?
C20  C21  1.371(5)  . .  ?
C21  C22  1.383(5)  . .  ?
C22  C23  1.366(5)  . .  ?
C23  N2  1.346(4)  . .  ?

loop_
     _geom_contact_atom_site_label_1
     _geom_contact_atom_site_label_2
     _geom_contact_distance
     _geom_contact_site_symmetry_1
     _geom_contact_site_symmetry_2
     _geom_contact_publ_flag
     ?   ?   ?   ?   ?   ?

loop_
_geom_angle_atom_site_label_1
_geom_angle_atom_site_label_2
_geom_angle_atom_site_label_3
_geom_angle
_geom_angle_site_symmetry_1
_geom_angle_site_symmetry_2
_geom_angle_site_symmetry_3
_geom_angle_publ_flag
C4  PD  N1  82.0(1)  . .  .  ?
C4  PD  C13  97.9(1)  . .  .  ?
C4  PD  N2  168.0(1)  . .  .  ?
N1  PD  C13  164.8(1)  . .  .  ?
N1  PD  N2  102.3(1)  . .  .  ?
C13  PD  N2  81.0(1)  . .  .  ?
C1  CR  C2  88.0(2)  . .  .  ?
C1  CR  C3  87.8(2)  . .  .  ?
C2  CR  C3  86.5(2)  . .  .  ?
C5  C4  C9  117.0(3)  . .  .  ?
C4  C5  C6  121.6(4)  . .  .  ?
C5  C6  C7  120.2(4)  . .  .  ?
C6  C7  C8  119.9(3)  . .  .  ?
C7  C8  C9  119.6(4)  . .  .  ?
C4  C9  C8  121.6(4)  . .  .  ?
C4  C9  C10  116.2(3)  . .  .  ?
C8  C9  C10  122.3(4)  . .  .  ?
C9  C10  N1  109.7(3)  . .  .  ?
C10  N1  C11  108.4(2)  . .  .  ?
C10  N1  C12  109.2(3)  . .  .  ?
C11  N1  C12  109.5(3)  . .  .  ?
C14  C13  C18  116.5(3)  . .  .  ?
C13  C14  C15  121.7(3)  . .  .  ?
C14  C15  C16  121.5(3)  . .  .  ?
C15  C16  C17  118.5(3)  . .  .  ?
C16  C17  C18  120.9(3)  . .  .  ?
C13  C18  C17  120.8(3)  . .  .  ?
C13  C18  C19  116.7(3)  . .  .  ?
C17  C18  C19  122.4(3)  . .  .  ?
C18  C19  C20  124.7(3)  . .  .  ?
C18  C19  N2  114.6(3)  . .  .  ?
C20  C19  N2  120.7(3)  . .  .  ?
C19  C20  C21  120.0(3)  . .  .  ?
C20  C21  C22  119.0(3)  . .  .  ?
C21  C22  C23  118.5(3)  . .  .  ?
C22  C23  N2  124.0(3)  . .  .  ?
C19  N2  C23  117.7(3)  . .  .  ?


#===END
data_8b                                 

#===============================================================================

# 5. CHEMICAL DATA

_chemical_name_systematic
; ?
;
_chemical_name_common              ?
_chemical_formula_moiety           'C25 H16 Cr N2 O3 Pd'
_chemical_formula_structural       ?
_chemical_formula_analytical       ?
_chemical_formula_sum              'C25 H16 Cr N2 O3 Pd'
_chemical_formula_weight           550.81
_chemical_melting_point            ?
_chemical_compound_source          ?

 loop_
     _atom_type_symbol
     _atom_type_description
     _atom_type_scat_dispersion_real
     _atom_type_scat_dispersion_imag
     _atom_type_scat_source
 C  ?  0.002  0.002 International_Tables_Vol_IV_Table_2.3.1
 H  ?  0.000  0.000 International_Tables_Vol_IV_Table_2.3.1
 Cr ?  0.284  0.624 International_Tables_Vol_IV_Table_2.3.1
 N  ?  0.004  0.003 International_Tables_Vol_IV_Table_2.3.1
 O  ?  0.008  0.006 International_Tables_Vol_IV_Table_2.3.1
 Pd ? -1.177  1.007 International_Tables_Vol_IV_Table_2.3.1


#===============================================================================

 # 6. CRYSTAL DATA

_symmetry_cell_setting              monoclinic
_symmetry_space_group_name_H-M      'C 1 2/c 1'
_symmetry_space_group_name_Hall     '-C 2yc'
loop_
     _symmetry_equiv_pos_as_xyz
     'x,y,z'
     -x,+y,1/2-z
     -x,-y,-z
     +x,-y,1/2+z
     1/2+x,1/2+y,+z
     1/2-x,1/2+y,1/2-z
     1/2-x,1/2-y,-z
     1/2+x,1/2-y,1/2+z
_cell_length_a                     28.457(2)
_cell_length_b                     11.4642(8)
_cell_length_c                     14.7537(9)
_cell_angle_alpha                  90
_cell_angle_beta                   95.678(5)
_cell_angle_gamma                  90
_cell_volume                       4789.6(5)
_cell_formula_units_Z              8
_cell_measurement_temperature      173
_cell_measurement_reflns_used      8042
_cell_measurement_theta_min         1.4
_cell_measurement_theta_max        27.5
_cell_special_details
;
Cell parameters refined using Scalepack part of DENZO
 Z. Otwinowski, W. Minor, 1997
;

_exptl_crystal_description         prism
_exptl_crystal_colour              'orange'
_exptl_crystal_size_max            0.18
_exptl_crystal_size_mid            0.14
_exptl_crystal_size_min            0.01
_exptl_crystal_density_meas        ?
_exptl_crystal_density_diffrn      1.53
_exptl_crystal_density_method      'none'

_exptl_crystal_F_000               2192
_exptl_absorpt_coefficient_mu      1.232
_exptl_absorpt_correction_type     refdelf_(Walker_&_Stuart,_1983)         
_exptl_absorpt_correction_T_min    0.8539
_exptl_absorpt_correction_T_max    1.0000

#===============================================================================

# 7. EXPERIMENTAL DATA

_diffrn_special_details
; ?
;

_diffrn_ambient_temperature        173
_diffrn_radiation_wavelength       0.71073
_diffrn_radiation_type             Mo-K\a

_diffrn_source                     xray_tube

_diffrn_radiation_monochromator    graphite
_diffrn_measurement_device_type    KappaCCD
_diffrn_measurement_method         '\p scans' 

_diffrn_measurement_details
;
   8042 reflections were collected using program Collect
 ("Collect" Data collection software, Nonius B.V., 1998)
 The conditions were as follow : crystal to detector distance =  36. mm.
 Scan angle =  1.6 deg 1 scans of   60 sec per frame.
 Data collection was divided into  1 set(s)
 with the following starting angles and number of frames :

 Set 1 Theta =    6.30 Omega =    0.00 Kappa =    0.00   90 frames
 Friedel pairs were averaged. Internal R = 0.05
;

_diffrn_standards_number           ?
_diffrn_standards_interval_count   ?
_diffrn_standards_interval_time    ?
_diffrn_standards_decay_%          0

_diffrn_reflns_number              8042
_diffrn_reflns_av_R_equivalents    0.050
_diffrn_reflns_av_sigmaI/netI      0.333
_diffrn_reflns_limit_h_min         -36
_diffrn_reflns_limit_h_max         36
_diffrn_reflns_limit_k_min         -14
_diffrn_reflns_limit_k_max         13
_diffrn_reflns_limit_l_min         -17
_diffrn_reflns_limit_l_max         17
_diffrn_reflns_theta_min           2.5
_diffrn_reflns_theta_max           27.47

_reflns_number_total               5007
_reflns_number_gt                  2346
_reflns_threshold_expression       >3.0\s(I)

_computing_structure_solution      Direct_methods_(SIR,_Burla_et_al.,_1989)
_computing_structure_refinement    LSFM_OpenMoleN_(_1997)
_computing_molecular_graphics      ?
_computing_publication_material    CIFGEN_IN_OpenMoleN_(_1997)

#===============================================================================

# 8. REFINEMENT DATA


_refine_ls_structure_factor_coef   F
_refine_ls_matrix_type             full
_refine_ls_weighting_scheme        sigma
_refine_ls_hydrogen_treatment      noref
_refine_ls_extinction_method       none
_refine_ls_extinction_expression   ?
_refine_ls_extinction_coef         ?
_refine_ls_abs_structure_Flack     ?
_refine_ls_number_reflns           2346
_refine_ls_number_parameters       289
_refine_ls_number_restraints       0
_refine_ls_number_constraints      0
_refine_ls_R_factor_all            0.131
_refine_ls_R_factor_gt             0.056
_refine_ls_wR_factor_all           0.565
_refine_ls_wR_factor_ref           0.087
_refine_ls_goodness_of_fit_all     12.007
_refine_ls_goodness_of_fit_ref     1.043
_refine_ls_shift/su_max            0.010
_refine_ls_shift/esd_mean          0.001
_refine_diff_density_max           0.832
_refine_diff_density_min           -0.323

#===============================================================================

# 9. ATOMIC COORDINATES AND THERMAL PARAMETERS

loop_
_atom_site_label
_atom_site_fract_x
_atom_site_fract_y
_atom_site_fract_z
_atom_site_U_iso_or_equiv
_atom_site_adp_type
_atom_site_calc_flag
_atom_site_calc_attached_atom
_atom_site_type_symbol
PD  0.79880(4)  0.13483(9)  0.17074(7)  0.0279(4)  Uani  ? ?  Pd
CR  0.92084(8)  0.0983(2)  0.0584(1)  0.034(1)  Uani  ? ?  Cr
C1  0.8958(5)  0.249(1)  0.042(1)  0.048(9)  Uani  ? ?  C
O1  0.8820(4)  0.341(1)  0.032(1)  0.077(8)  Uani  ? ?  O
C2  0.9775(5)  0.155(1)  0.105(1)  0.047(9)  Uani  ? ?  C
O2  1.0141(4)  0.189(1)  0.1348(9)  0.078(8)  Uani  ? ?  O
C3  0.9404(5)  0.111(1)  -0.055(1)  0.041(8)  Uani  ? ?  C
O3  0.9529(4)  0.124(1)  -0.1268(7)  0.067(7)  Uani  ? ?  O
C4  0.8568(4)  0.056(1)  0.1356(8)  0.026(7)  Uani  ? ?  C
C5  0.8983(5)  0.025(1)  0.1884(9)  0.034(7)  Uani  ? ?  C
C6  0.9332(5)  -0.048(1)  0.155(1)  0.039(8)  Uani  ? ?  C
C7  0.9260(5)  -0.093(1)  0.0663(9)  0.041(8)  Uani  ? ?  C
C8  0.8849(4)  -0.063(1)  0.0102(9)  0.030(7)  Uani  ? ?  C
C9  0.8519(4)  0.010(1)  0.0436(9)  0.028(7)  Uani  ? ?  C
C10  0.8087(5)  0.039(1)  -0.0124(9)  0.030(7)  Uani  ? ?  C
C11  0.8019(5)  0.026(1)  -0.1064(9)  0.036(8)  Uani  ? ?  C
C12  0.7586(6)  0.053(1)  -0.1512(9)  0.039(8)  Uani  ? ?  C
C13  0.7218(5)  0.094(1)  -0.103(1)  0.040(8)  Uani  ? ?  C
C14  0.7310(5)  0.110(1)  -0.0106(9)  0.036(8)  Uani  ? ?  C
N1  0.7734(4)  0.0814(9)  0.0362(7)  0.030(6)  Uani  ? ?  N
C15  0.8271(5)  0.224(1)  0.2791(8)  0.026(7)  Uani  ? ?  C
C16  0.8730(5)  0.263(1)  0.3005(9)  0.035(8)  Uani  ? ?  C
C17  0.8858(5)  0.337(1)  0.372(1)  0.041(9)  Uani  ? ?  C
C18  0.8535(6)  0.374(1)  0.428(1)  0.045(8)  Uani  ? ?  C
C19  0.8076(6)  0.340(1)  0.409(1)  0.045(8)  Uani  ? ?  C
C20  0.7935(5)  0.267(1)  0.3351(9)  0.034(7)  Uani  ? ?  C
C21  0.7439(5)  0.236(1)  0.3110(9)  0.034(7)  Uani  ? ?  C
C22  0.7051(6)  0.260(1)  0.360(1)  0.052(9)  Uani  ? ?  C
C23  0.6613(5)  0.223(2)  0.331(1)  0.06(1)  Uani  ? ?  C
C24  0.6535(5)  0.161(2)  0.250(1)  0.06(1)  Uani  ? ?  C
C25  0.6918(5)  0.140(1)  0.2025(9)  0.043(8)  Uani  ? ?  C
N2  0.7362(4)  0.1783(9)  0.2291(7)  0.034(6)  Uani  ? ?  N
H1  0.9033  0.0523  0.2493  0.0436  Uiso  calc  C5  H
H2  0.9614  -0.0654  0.1921  0.0513  Uiso  calc  C6  H
H3  0.9487  -0.1433  0.0443  0.0517  Uiso  calc  C7  H
H4  0.8799  -0.0918  -0.0502  0.0397  Uiso  calc  C8  H
H5  0.8267  -0.0021  -0.1392  0.0467  Uiso  calc  C11  H
H6  0.7537  0.0450  -0.2155  0.0555  Uiso  calc  C12  H
H7  0.6915  0.1096  -0.1337  0.0542  Uiso  calc  C13  H
H8  0.7069  0.1418  0.0221  0.0480  Uiso  calc  C14  H
H9  0.8966  0.2376  0.2639  0.0467  Uiso  calc  C16  H
H10  0.9177  0.3625  0.3827  0.0554  Uiso  calc  C17  H
H11  0.8628  0.4225  0.4790  0.0624  Uiso  calc  C18  H
H12  0.7847  0.3670  0.4473  0.0599  Uiso  calc  C19  H
H13  0.7099  0.3026  0.4154  0.0676  Uiso  calc  C22  H
H14  0.6356  0.2405  0.3650  0.0844  Uiso  calc  C23  H
H15  0.6228  0.1342  0.2290  0.0814  Uiso  calc  C24  H
H16  0.6869  0.0955  0.1479  0.0548  Uiso  calc  C25  H


loop_
_atom_site_aniso_label
_atom_site_aniso_U_11
_atom_site_aniso_U_22
_atom_site_aniso_U_33
_atom_site_aniso_U_12
_atom_site_aniso_U_13
_atom_site_aniso_U_23
_atom_site_aniso_type_symbol
PD  0.0256(4)  0.0325(4)  0.0261(4)  0.0013(6)  0.0044(4)  -0.0010(5)  Pd
CR  0.029(1)  0.042(1)  0.032(1)  -0.001(1)  0.006(1)  0.001(1)  Cr
C1  0.026(7)  0.06(1)  0.07(1)  -0.002(7)  0.019(7)  0.004(8)  C
O1  0.059(7)  0.049(7)  0.16(1)  0.018(6)  0.027(8)  0.027(7)  O
C2  0.033(8)  0.07(1)  0.047(9)  -0.019(8)  -0.008(7)  -0.001(8)  C
O2  0.062(7)  0.099(9)  0.078(8)  -0.030(7)  -0.010(7)  0.003(8)  O
C3  0.037(8)  0.049(9)  0.039(8)  -0.002(7)  0.008(7)  -0.002(7)  C
O3  0.075(7)  0.11(1)  0.036(6)  -0.015(8)  0.021(6)  0.006(7)  O
C4  0.020(6)  0.031(7)  0.029(7)  -0.003(6)  0.007(6)  0.002(6)  C
C5  0.033(7)  0.036(7)  0.032(7)  0.005(6)  0.005(6)  0.004(6)  C
C6  0.032(7)  0.046(8)  0.041(8)  0.006(7)  0.006(7)  0.008(7)  C
C7  0.042(8)  0.043(8)  0.039(8)  0.004(7)  0.023(6)  -0.003(6)  C
C8  0.025(7)  0.038(7)  0.029(7)  -0.004(6)  0.006(6)  -0.006(6)  C
C9  0.020(6)  0.035(7)  0.030(7)  0.001(6)  0.002(6)  0.006(6)  C
C10  0.033(7)  0.025(6)  0.033(7)  -0.004(6)  0.012(6)  -0.002(5)  C
C11  0.039(8)  0.042(8)  0.027(7)  0.005(7)  0.008(6)  -0.002(6)  C
C12  0.07(1)  0.033(7)  0.026(7)  0.002(8)  0.000(7)  -0.005(6)  C
C13  0.049(9)  0.032(7)  0.039(8)  -0.004(7)  -0.018(7)  0.003(6)  C
C14  0.033(7)  0.033(8)  0.044(8)  -0.001(6)  -0.003(7)  0.005(6)  C
N1  0.030(6)  0.030(5)  0.029(6)  -0.004(5)  -0.001(5)  0.006(5)  N
C15  0.041(8)  0.038(7)  0.011(6)  0.004(7)  -0.000(6)  -0.004(5)  C
C16  0.031(7)  0.043(8)  0.032(7)  0.002(7)  -0.002(6)  0.001(6)  C
C17  0.043(9)  0.032(8)  0.050(9)  -0.003(7)  -0.010(8)  -0.001(6)  C
C18  0.061(9)  0.031(7)  0.049(8)  0.006(8)  -0.008(8)  -0.014(7)  C
C19  0.062(9)  0.035(8)  0.043(8)  0.021(7)  0.010(7)  -0.005(6)  C
C20  0.046(8)  0.028(7)  0.031(7)  0.004(7)  -0.001(7)  0.000(6)  C
C21  0.049(8)  0.024(6)  0.032(7)  0.014(6)  0.010(7)  0.000(6)  C
C22  0.051(9)  0.07(1)  0.043(8)  0.011(8)  0.018(7)  -0.016(7)  C
C23  0.042(8)  0.09(1)  0.07(1)  0.012(9)  0.029(8)  -0.012(9)  C
C24  0.033(8)  0.09(1)  0.07(1)  0.005(9)  0.016(8)  -0.01(1)  C
C25  0.039(7)  0.046(8)  0.044(8)  -0.000(8)  0.013(7)  -0.006(7)  C
N2  0.032(6)  0.035(6)  0.036(6)  0.003(5)  0.007(5)  0.001(5)  N

# 10. MOLECULAR GEOMETRY


loop_
_geom_bond_atom_site_label_1
_geom_bond_atom_site_label_2
_geom_bond_distance
_geom_bond_site_symmetry_1
_geom_bond_site_symmetry_2
_geom_bond_publ_flag
PD  C4  1.99(1)  . .  ?
PD  N1  2.13(1)  . .  ?
PD  C15  2.00(1)  . .  ?
PD  N2  2.11(1)  . .  ?
CR  C1  1.87(2)  . .  ?
CR  C2  1.81(2)  . .  ?
CR  C3  1.82(2)  . .  ?
CR  C4  2.29(1)  . .  ?
CR  C5  2.25(1)  . .  ?
CR  C6  2.20(1)  . .  ?
CR  C7  2.20(1)  . .  ?
CR  C8  2.19(1)  . .  ?
CR  C9  2.20(1)  . .  ?
C1  O1  1.14(2)  . .  ?
C2  O2  1.16(2)  . .  ?
C3  O3  1.16(2)  . .  ?
C4  C5  1.40(2)  . .  ?
C4  C9  1.45(2)  . .  ?
C5  C6  1.42(2)  . .  ?
C6  C7  1.40(2)  . .  ?
C7  C8  1.41(2)  . .  ?
C8  C9  1.38(2)  . .  ?
C9  C10  1.45(2)  . .  ?
C10  C11  1.39(2)  . .  ?
C10  N1  1.38(2)  . .  ?
C11  C12  1.38(2)  . .  ?
C12  C13  1.40(2)  . .  ?
C13  C14  1.38(2)  . .  ?
C14  N1  1.37(2)  . .  ?
C15  C16  1.39(2)  . .  ?
C15  C20  1.41(2)  . .  ?
C16  C17  1.37(2)  . .  ?
C17  C18  1.36(2)  . .  ?
C18  C19  1.36(2)  . .  ?
C19  C20  1.41(2)  . .  ?
C20  C21  1.46(2)  . .  ?
C21  C22  1.41(2)  . .  ?
C21  N2  1.38(2)  . .  ?
C22  C23  1.35(2)  . .  ?
C23  C24  1.38(2)  . .  ?
C24  C25  1.38(2)  . .  ?
C25  N2  1.36(2)  . .  ?

loop_
     _geom_contact_atom_site_label_1
     _geom_contact_atom_site_label_2
     _geom_contact_distance
     _geom_contact_site_symmetry_1
     _geom_contact_site_symmetry_2
     _geom_contact_publ_flag
     ?   ?   ?   ?   ?   ?

loop_
_geom_angle_atom_site_label_1
_geom_angle_atom_site_label_2
_geom_angle_atom_site_label_3
_geom_angle
_geom_angle_site_symmetry_1
_geom_angle_site_symmetry_2
_geom_angle_site_symmetry_3
_geom_angle_publ_flag
C4  PD  N1  80.9(5)  . .  .  ?
C4  PD  C15  99.3(6)  . .  .  ?
C4  PD  N2  164.9(5)  . .  .  ?
N1  PD  C15  164.4(5)  . .  .  ?
N1  PD  N2  103.0(4)  . .  .  ?
C15  PD  N2  80.9(5)  . .  .  ?
C1  CR  C2  91.7(8)  . .  .  ?
C1  CR  C3  87.3(7)  . .  .  ?
C1  CR  C4  86.9(6)  . .  .  ?
C1  CR  C5  108.6(6)  . .  .  ?
C1  CR  C6  144.9(7)  . .  .  ?
C1  CR  C7  161.4(7)  . .  .  ?
C1  CR  C8  125.1(7)  . .  .  ?
C1  CR  C9  95.1(6)  . .  .  ?
C2  CR  C3  88.8(7)  . .  .  ?
C2  CR  C4  127.4(6)  . .  .  ?
C2  CR  C5  97.4(6)  . .  .  ?
C2  CR  C6  87.0(7)  . .  .  ?
C2  CR  C7  106.6(7)  . .  .  ?
C2  CR  C8  142.7(7)  . .  .  ?
C2  CR  C9  162.7(6)  . .  .  ?
C3  CR  C4  143.5(6)  . .  .  ?
C3  CR  C5  162.6(6)  . .  .  ?
C3  CR  C6  127.7(6)  . .  .  ?
C3  CR  C7  96.1(6)  . .  .  ?
C3  CR  C8  86.9(6)  . .  .  ?
C3  CR  C9  107.3(6)  . .  .  ?
C4  CR  C5  35.8(5)  . .  .  ?
